# Supplementary material for: Association of prebiotic fiber intake with colorectal cancer risk: the PrebiotiCa study
Source: PubMed Central journal article supplement (PMC9899730; doi:10.1007/s00394-022-02984-y), 2022-09-11
Supplement: 394_2022_2984_MOESM1_ESM.pdf [file 394_2022_2984_MOESM1_ESM.pdf]

**Supplementary Table 1.** Distribution of selected factors according to quintiles of Inulin-type fructans, raffinose, stachyose and total fructo-oligosaccharides (FOS) among 4155 controls. Italy, 1992-1996.

|                                         | Quintiles of intake |             |             |             |             |
|-----------------------------------------|---------------------|-------------|-------------|-------------|-------------|
|                                         | Q1                  | Q2          | Q3          | Q4          | Q5          |
| <b>Inulin-type fructans (ITFs)</b>      |                     |             |             |             |             |
| Women (%)                               | 442 (53.2)          | 437 (52.6)  | 406 (48.9)  | 423 (51.0)  | 373 (44.9)  |
| Age, years*                             | 57.1 (10.9)         | 57.6 (9.9)  | 57.7 (10.5) | 55.4 (11.5) | 53.8 (12.7) |
| Body mass index*, kg/m <sup>2</sup>     | 26.2 (4.1)          | 26.1 (3.9)  | 26.2 (4.0)  | 25.6 (3.9)  | 24.9 (3.8)  |
| Medium/high physical activity (%)       | 612 (73.7)          | 574 (69.1)  | 572 (68.8)  | 535 (64.5)  | 509 (61.3)  |
| Current smokers (%)                     | 227 (27.3)          | 225 (27.1)  | 222 (26.7)  | 262 (31.6)  | 286 (34.4)  |
| Alcohol drinkers (%)                    | 636 (76.6)          | 638 (76.8)  | 658 (79.3)  | 648 (78.5)  | 650 (78.3)  |
| Postmenopausal status (in women) (%)    | 318 (72.0)          | 330 (75.5)  | 286 (70.4)  | 275 (65.0)  | 224 (60.1)  |
| Diabetes (%)                            | 42 (5.1)            | 55 (6.6)    | 51 (6.1)    | 21 (2.5)    | 12 (1.4)    |
| Regular aspirin use (%)                 | 13 (1.6)            | 14 (1.7)    | 10 (1.2)    | 11 (1.3)    | 17 (2.1)    |
| Family history of intestinal cancer (%) | 25 (3.0)            | 29 (3.5)    | 33 (4.0)    | 24 (2.9)    | 35 (4.2)    |
| Total energy intake*, kcal/day          | 2089 (750)          | 2326 (765)  | 2441 (763)  | 2509 (781)  | 2769 (943)  |
| <b>Raffinose (GOS)</b>                  |                     |             |             |             |             |
| Women (%)                               | 560 (67.5)          | 444 (53.4)  | 399 (48.0)  | 355 (42.7)  | 323 (38.9)  |
| Age, years*                             | 57.2 (11.2)         | 56.8 (11.1) | 56.2 (10.8) | 56.1 (11.2) | 55.3 (11.9) |
| Body mass index*, kg/m <sup>2</sup>     | 25.9 (4.3)          | 25.9 (4.1)  | 25.8 (3.9)  | 25.8 (3.8)  | 25.6 (3.7)  |
| Medium/high physical activity (%)       | 524 (63.1)          | 590 (70.9)  | 564 (67.9)  | 573 (69.0)  | 551 (66.5)  |
| Current smokers (%)                     | 237 (28.6)          | 257 (30.9)  | 238 (28.6)  | 240 (28.9)  | 250 (30.1)  |
| Alcohol drinkers (%)                    | 553 (66.6)          | 664 (80.1)  | 669 (80.7)  | 677 (81.5)  | 667 (80.6)  |
| Postmenopausal status (in women) (%)    | 406 (72.5)          | 297 (66.9)  | 274 (68.7)  | 248 (69.9)  | 208 (64.4)  |
| Diabetes (%)                            | 57 (6.9)            | 45 (5.4)    | 34 (4.1)    | 32 (3.9)    | 13 (1.6)    |
| Regular aspirin use (%)                 | 11 (1.3)            | 11 (1.3)    | 15 (1.8)    | 16 (1.9)    | 12 (1.5)    |
| Family history of intestinal cancer (%) | 32 (3.9)            | 25 (3.0)    | 28 (3.4)    | 34 (4.1)    | 27 (3.3)    |
| Total energy intake*, kcal/day          | 1684 (522)          | 2131 (567)  | 2398 (569)  | 2646 (620)  | 3276 (876)  |
| <b>Stachyose (GOS)</b>                  |                     |             |             |             |             |
| Women (%)                               | 469 (56.4)          | 410 (49.4)  | 419 (50.4)  | 401 (48.3)  | 382 (46.0)  |
| Age, years*                             | 55.5 (12.2)         | 55.7 (11.4) | 55.6 (11.0) | 56.9 (11.1) | 57.7 (10.5) |
| Body mass index*, kg/m <sup>2</sup>     | 25.9 (4.4)          | 26.0 (4.0)  | 25.7 (3.9)  | 25.7 (3.8)  | 25.7 (3.6)  |
| Medium/high physical activity           | 525 (63.2)          | 559 (67.4)  | 579 (69.7)  | 581 (69.9)  | 558 (67.2)  |
| Current smokers (%)                     | 253 (30.5)          | 247 (29.8)  | 253 (30.5)  | 229 (27.6)  | 240 (28.8)  |
| Alcohol drinkers (%)                    | 611 (73.6)          | 646 (78.0)  | 662 (79.8)  | 662 (79.9)  | 649 (78.2)  |
| Postmenopausal status (in women) (%)    | 304 (64.8)          | 280 (68.3)  | 281 (67.1)  | 281 (70.1)  | 287 (75.1)  |
| Diabetes (%)                            | 37 (4.5)            | 33 (4.0)    | 39 (4.7)    | 39 (4.7)    | 33 (4.0)    |
| Regular aspirin use (%)                 | 9 (1.1)             | 19 (2.3)    | 10 (1.2)    | 13 (1.6)    | 14 (1.7)    |
| Family history of intestinal cancer (%) | 24 (2.9)            | 34 (4.1)    | 29 (3.5)    | 26 (3.1)    | 33 (4.0)    |
| Total energy intake*, kcal/day          | 2098 (819)          | 2342 (776)  | 2404 (800)  | 2508 (759)  | 2783 (860)  |
| <b>Total FOSs</b>                       |                     |             |             |             |             |
| Women (%)                               | 547 (65.8)          | 457 (55.1)  | 421 (50.7)  | 348 (41.9)  | 308 (37.1)  |
| Age, years*                             | 57.5 (10.6)         | 56.8 (10.9) | 56.8 (10.9) | 55.8 (11.4) | 54.6 (12.3) |
| Body mass index*, kg/m <sup>2</sup>     | 26.0 (4.1)          | 26.0 (4.0)  | 25.8 (4.0)  | 25.8 (3.9)  | 25.4 (3.7)  |
| Medium/high physical activity (%)       | 552 (66.4)          | 582 (70.1)  | 562 (67.6)  | 550 (66.2)  | 556 (67.0)  |
| Current smokers (%)                     | 241 (29.0)          | 228 (27.5)  | 232 (27.9)  | 240 (28.9)  | 281 (33.8)  |
| Alcohol drinkers (%)                    | 572 (68.8)          | 649 (78.3)  | 656 (79.1)  | 673 (81.4)  | 680 (81.8)  |
| Postmenopausal status (in women) (%)    | 400 (73.1)          | 323 (70.7)  | 280 (66.5)  | 231 (66.4)  | 199 (64.6)  |
| Diabetes (%)                            | 72 (8.7)            | 42 (5.1)    | 37 (4.5)    | 18 (2.2)    | 12 (1.4)    |
| Regular aspirin use (%)                 | 7 (0.8)             | 16 (1.9)    | 12 (1.4)    | 14 (1.7)    | 16 (1.9)    |
| Family history of intestinal cancer (%) | 21 (2.5)            | 30 (3.6)    | 38 (4.6)    | 28 (3.4)    | 29 (3.5)    |
| Total energy intake*, kcal/day          | 1689 (537)          | 2136 (530)  | 2375 (562)  | 2711 (642)  | 3223 (912)  |

\* Numbers are means (standard deviations).

Abbreviations: FOS, fructo-oligosaccharide; GOS, galactooligosaccharide.
